# Supplementary material for: In Silico, In Vitro, and In Vivo Evaluation of the Developmental Toxicity, Estrogenic Activity, and Mutagenicity of Four Natural Phenolic Flavonoids at Low Exposure Levels
Source: PubMed Central journal article supplement — ACS Omega. 2022 Feb 1;7(6):4757–68. doi: 10.1021/acsomega.1c04239 (PMC8851455; doi:10.1021/acsomega.1c04239), 2022-02-01
Supplement: ao1c04239_si_001.pdf [file ao1c04239_si_001.pdf]

*In silico, In Vitro* and *In Vivo* Evaluation of the developmental toxicity, estrogenic activity and mutagenicity of four natural phenolic flavonoids at low exposure levels

Xinwen Zhang<sup>1</sup>, Changqing Wu<sup>1\*</sup>

<sup>1</sup> Department of Animal and Food Sciences, University of Delaware, Newark, Delaware 19716, United States.

\*Corresponding author: Changqing Wu, Professor

Department of Animal and Food Sciences

University of Delaware

531 S. College Avenue

044 Townsend Hall

Newark, DE 19716

Phone: (302) 831-3029

E-mail: [changwu@udel.edu](mailto:changwu@udel.edu)

## Supplemental materials (Tables and Figures)

Table S1. Binding energy of E2, luteolin, apigenin, quercetin, and genistein for 14 nuclear receptors with 4 antagonist conformation. There are four probability binding classes: red (high level of binding), orange (good binding), yellow (medium binding), and green (low binding).

| Ligand          | Structure                                                                           | Binding energy with receptors (kcal/mol)                                                                                                                                                                                                                                                                                                                                                                                                                                                  |           |               |             |                 |             |                |          |              |              |              |          |              |              |              |          |             |            |            |
|-----------------|-------------------------------------------------------------------------------------|-------------------------------------------------------------------------------------------------------------------------------------------------------------------------------------------------------------------------------------------------------------------------------------------------------------------------------------------------------------------------------------------------------------------------------------------------------------------------------------------|-----------|---------------|-------------|-----------------|-------------|----------------|----------|--------------|--------------|--------------|----------|--------------|--------------|--------------|----------|-------------|------------|------------|
| E2              | 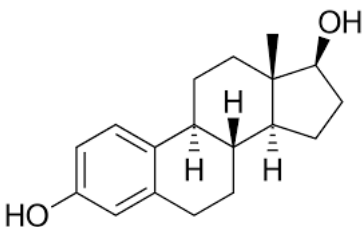   | <table border="1"> <tr> <td>AR: -10.5</td> <td>AR an.: -10.1</td> <td>ER α: -10.6</td> </tr> <tr> <td>ER α an.: -10.7</td> <td>ER β: -10.0</td> <td>ER β an.: -9.2</td> </tr> <tr> <td>GR: -9.5</td> <td>GR an.: -8.0</td> <td>LXR α: -10.4</td> </tr> <tr> <td>LXR β: -10.8</td> <td>MR: -8.6</td> <td>PPAR α: -8.0</td> </tr> <tr> <td>PPAR β: -8.2</td> <td>PPAR γ: -8.0</td> <td>PR: -2.7</td> </tr> <tr> <td>RXR α: -8.8</td> <td>TR α: -9.6</td> <td>TR β: -9.8</td> </tr> </table> | AR: -10.5 | AR an.: -10.1 | ER α: -10.6 | ER α an.: -10.7 | ER β: -10.0 | ER β an.: -9.2 | GR: -9.5 | GR an.: -8.0 | LXR α: -10.4 | LXR β: -10.8 | MR: -8.6 | PPAR α: -8.0 | PPAR β: -8.2 | PPAR γ: -8.0 | PR: -2.7 | RXR α: -8.8 | TR α: -9.6 | TR β: -9.8 |
| AR: -10.5       | AR an.: -10.1                                                                       | ER α: -10.6                                                                                                                                                                                                                                                                                                                                                                                                                                                                               |           |               |             |                 |             |                |          |              |              |              |          |              |              |              |          |             |            |            |
| ER α an.: -10.7 | ER β: -10.0                                                                         | ER β an.: -9.2                                                                                                                                                                                                                                                                                                                                                                                                                                                                            |           |               |             |                 |             |                |          |              |              |              |          |              |              |              |          |             |            |            |
| GR: -9.5        | GR an.: -8.0                                                                        | LXR α: -10.4                                                                                                                                                                                                                                                                                                                                                                                                                                                                              |           |               |             |                 |             |                |          |              |              |              |          |              |              |              |          |             |            |            |
| LXR β: -10.8    | MR: -8.6                                                                            | PPAR α: -8.0                                                                                                                                                                                                                                                                                                                                                                                                                                                                              |           |               |             |                 |             |                |          |              |              |              |          |              |              |              |          |             |            |            |
| PPAR β: -8.2    | PPAR γ: -8.0                                                                        | PR: -2.7                                                                                                                                                                                                                                                                                                                                                                                                                                                                                  |           |               |             |                 |             |                |          |              |              |              |          |              |              |              |          |             |            |            |
| RXR α: -8.8     | TR α: -9.6                                                                          | TR β: -9.8                                                                                                                                                                                                                                                                                                                                                                                                                                                                                |           |               |             |                 |             |                |          |              |              |              |          |              |              |              |          |             |            |            |
| Luteolin        |  | <table border="1"> <tr> <td>AR: -9.1</td> <td>AR an.: -9.0</td> <td>ER α: -8.6</td> </tr> <tr> <td>ER α an.: -9.3</td> <td>ER β: -7.6</td> <td>ER β an.: -8.6</td> </tr> <tr> <td>GR: -9.2</td> <td>GR an.: -8.0</td> <td>LXR α: -9.0</td> </tr> <tr> <td>LXR β: -9.6</td> <td>MR: -9.3</td> <td>PPAR α: -9.0</td> </tr> <tr> <td>PPAR β: -8.5</td> <td>PPAR γ: -8.1</td> <td>PR: -2.6</td> </tr> <tr> <td>RXR α: -9.7</td> <td>TR α: -9.4</td> <td>TR β: -9.5</td> </tr> </table>        | AR: -9.1  | AR an.: -9.0  | ER α: -8.6  | ER α an.: -9.3  | ER β: -7.6  | ER β an.: -8.6 | GR: -9.2 | GR an.: -8.0 | LXR α: -9.0  | LXR β: -9.6  | MR: -9.3 | PPAR α: -9.0 | PPAR β: -8.5 | PPAR γ: -8.1 | PR: -2.6 | RXR α: -9.7 | TR α: -9.4 | TR β: -9.5 |
| AR: -9.1        | AR an.: -9.0                                                                        | ER α: -8.6                                                                                                                                                                                                                                                                                                                                                                                                                                                                                |           |               |             |                 |             |                |          |              |              |              |          |              |              |              |          |             |            |            |
| ER α an.: -9.3  | ER β: -7.6                                                                          | ER β an.: -8.6                                                                                                                                                                                                                                                                                                                                                                                                                                                                            |           |               |             |                 |             |                |          |              |              |              |          |              |              |              |          |             |            |            |
| GR: -9.2        | GR an.: -8.0                                                                        | LXR α: -9.0                                                                                                                                                                                                                                                                                                                                                                                                                                                                               |           |               |             |                 |             |                |          |              |              |              |          |              |              |              |          |             |            |            |
| LXR β: -9.6     | MR: -9.3                                                                            | PPAR α: -9.0                                                                                                                                                                                                                                                                                                                                                                                                                                                                              |           |               |             |                 |             |                |          |              |              |              |          |              |              |              |          |             |            |            |
| PPAR β: -8.5    | PPAR γ: -8.1                                                                        | PR: -2.6                                                                                                                                                                                                                                                                                                                                                                                                                                                                                  |           |               |             |                 |             |                |          |              |              |              |          |              |              |              |          |             |            |            |
| RXR α: -9.7     | TR α: -9.4                                                                          | TR β: -9.5                                                                                                                                                                                                                                                                                                                                                                                                                                                                                |           |               |             |                 |             |                |          |              |              |              |          |              |              |              |          |             |            |            |
| Apigenin        |  | <table border="1"> <tr> <td>AR: -8.9</td> <td>AR an.: -9.1</td> <td>ER α: -8.8</td> </tr> <tr> <td>ER α an.: -9.1</td> <td>ER β: -8.2</td> <td>ER β an.: -8.9</td> </tr> <tr> <td>GR: -8.8</td> <td>GR an.: -7.8</td> <td>LXR α: -8.8</td> </tr> <tr> <td>LXR β: -9.5</td> <td>MR: -9.0</td> <td>PPAR α: -9.3</td> </tr> <tr> <td>PPAR β: -8.2</td> <td>PPAR γ: -9.3</td> <td>PR: -2.5</td> </tr> <tr> <td>RXR α: -9.7</td> <td>TR α: -9.6</td> <td>TR β: -9.4</td> </tr> </table>        | AR: -8.9  | AR an.: -9.1  | ER α: -8.8  | ER α an.: -9.1  | ER β: -8.2  | ER β an.: -8.9 | GR: -8.8 | GR an.: -7.8 | LXR α: -8.8  | LXR β: -9.5  | MR: -9.0 | PPAR α: -9.3 | PPAR β: -8.2 | PPAR γ: -9.3 | PR: -2.5 | RXR α: -9.7 | TR α: -9.6 | TR β: -9.4 |
| AR: -8.9        | AR an.: -9.1                                                                        | ER α: -8.8                                                                                                                                                                                                                                                                                                                                                                                                                                                                                |           |               |             |                 |             |                |          |              |              |              |          |              |              |              |          |             |            |            |
| ER α an.: -9.1  | ER β: -8.2                                                                          | ER β an.: -8.9                                                                                                                                                                                                                                                                                                                                                                                                                                                                            |           |               |             |                 |             |                |          |              |              |              |          |              |              |              |          |             |            |            |
| GR: -8.8        | GR an.: -7.8                                                                        | LXR α: -8.8                                                                                                                                                                                                                                                                                                                                                                                                                                                                               |           |               |             |                 |             |                |          |              |              |              |          |              |              |              |          |             |            |            |
| LXR β: -9.5     | MR: -9.0                                                                            | PPAR α: -9.3                                                                                                                                                                                                                                                                                                                                                                                                                                                                              |           |               |             |                 |             |                |          |              |              |              |          |              |              |              |          |             |            |            |
| PPAR β: -8.2    | PPAR γ: -9.3                                                                        | PR: -2.5                                                                                                                                                                                                                                                                                                                                                                                                                                                                                  |           |               |             |                 |             |                |          |              |              |              |          |              |              |              |          |             |            |            |
| RXR α: -9.7     | TR α: -9.6                                                                          | TR β: -9.4                                                                                                                                                                                                                                                                                                                                                                                                                                                                                |           |               |             |                 |             |                |          |              |              |              |          |              |              |              |          |             |            |            |

|                |                                                                                   |                                                                                                                                                                                                                                                                                                                                                                                                                                                                                                     |          |              |            |                |            |                |          |              |             |             |          |              |              |              |          |             |            |            |
|----------------|-----------------------------------------------------------------------------------|-----------------------------------------------------------------------------------------------------------------------------------------------------------------------------------------------------------------------------------------------------------------------------------------------------------------------------------------------------------------------------------------------------------------------------------------------------------------------------------------------------|----------|--------------|------------|----------------|------------|----------------|----------|--------------|-------------|-------------|----------|--------------|--------------|--------------|----------|-------------|------------|------------|
| Quercetin      | 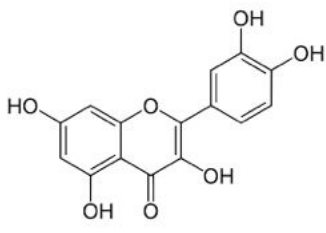 | <table border="1"> <tbody> <tr> <td>AR: -8.9</td> <td>AR an.: -8.6</td> <td>ER α: -8.2</td> </tr> <tr> <td>ER α an.: -8.3</td> <td>ER β: -7.1</td> <td>ER β an.: -8.2</td> </tr> <tr> <td>GR: -9.5</td> <td>GR an.: -8.1</td> <td>LXR α: -9.2</td> </tr> <tr> <td>LXR β: -9.2</td> <td>MR: -9.1</td> <td>PPAR α: -7.7</td> </tr> <tr> <td>PPAR β: -8.5</td> <td>PPAR γ: -9.3</td> <td>PR: -2.7</td> </tr> <tr> <td>RXR α: -9.0</td> <td>TR α: -9.1</td> <td>TR β: -9.2</td> </tr> </tbody> </table> | AR: -8.9 | AR an.: -8.6 | ER α: -8.2 | ER α an.: -8.3 | ER β: -7.1 | ER β an.: -8.2 | GR: -9.5 | GR an.: -8.1 | LXR α: -9.2 | LXR β: -9.2 | MR: -9.1 | PPAR α: -7.7 | PPAR β: -8.5 | PPAR γ: -9.3 | PR: -2.7 | RXR α: -9.0 | TR α: -9.1 | TR β: -9.2 |
| AR: -8.9       | AR an.: -8.6                                                                      | ER α: -8.2                                                                                                                                                                                                                                                                                                                                                                                                                                                                                          |          |              |            |                |            |                |          |              |             |             |          |              |              |              |          |             |            |            |
| ER α an.: -8.3 | ER β: -7.1                                                                        | ER β an.: -8.2                                                                                                                                                                                                                                                                                                                                                                                                                                                                                      |          |              |            |                |            |                |          |              |             |             |          |              |              |              |          |             |            |            |
| GR: -9.5       | GR an.: -8.1                                                                      | LXR α: -9.2                                                                                                                                                                                                                                                                                                                                                                                                                                                                                         |          |              |            |                |            |                |          |              |             |             |          |              |              |              |          |             |            |            |
| LXR β: -9.2    | MR: -9.1                                                                          | PPAR α: -7.7                                                                                                                                                                                                                                                                                                                                                                                                                                                                                        |          |              |            |                |            |                |          |              |             |             |          |              |              |              |          |             |            |            |
| PPAR β: -8.5   | PPAR γ: -9.3                                                                      | PR: -2.7                                                                                                                                                                                                                                                                                                                                                                                                                                                                                            |          |              |            |                |            |                |          |              |             |             |          |              |              |              |          |             |            |            |
| RXR α: -9.0    | TR α: -9.1                                                                        | TR β: -9.2                                                                                                                                                                                                                                                                                                                                                                                                                                                                                          |          |              |            |                |            |                |          |              |             |             |          |              |              |              |          |             |            |            |
| Genistein      |  | <table border="1"> <tbody> <tr> <td>AR: -9.1</td> <td>AR an.: -9.1</td> <td>ER α: -9.2</td> </tr> <tr> <td>ER α an.: -9.2</td> <td>ER β: -8.7</td> <td>ER β an.: -8.7</td> </tr> <tr> <td>GR: -8.9</td> <td>GR an.: -7.5</td> <td>LXR α: -8.7</td> </tr> <tr> <td>LXR β: -9.6</td> <td>MR: -9.2</td> <td>PPAR α: -8.1</td> </tr> <tr> <td>PPAR β: -8.6</td> <td>PPAR γ: -8.2</td> <td>PR: -2.4</td> </tr> <tr> <td>RXR α: -8.9</td> <td>TR α: -9.6</td> <td>TR β: -9.6</td> </tr> </tbody> </table> | AR: -9.1 | AR an.: -9.1 | ER α: -9.2 | ER α an.: -9.2 | ER β: -8.7 | ER β an.: -8.7 | GR: -8.9 | GR an.: -7.5 | LXR α: -8.7 | LXR β: -9.6 | MR: -9.2 | PPAR α: -8.1 | PPAR β: -8.6 | PPAR γ: -8.2 | PR: -2.4 | RXR α: -8.9 | TR α: -9.6 | TR β: -9.6 |
| AR: -9.1       | AR an.: -9.1                                                                      | ER α: -9.2                                                                                                                                                                                                                                                                                                                                                                                                                                                                                          |          |              |            |                |            |                |          |              |             |             |          |              |              |              |          |             |            |            |
| ER α an.: -9.2 | ER β: -8.7                                                                        | ER β an.: -8.7                                                                                                                                                                                                                                                                                                                                                                                                                                                                                      |          |              |            |                |            |                |          |              |             |             |          |              |              |              |          |             |            |            |
| GR: -8.9       | GR an.: -7.5                                                                      | LXR α: -8.7                                                                                                                                                                                                                                                                                                                                                                                                                                                                                         |          |              |            |                |            |                |          |              |             |             |          |              |              |              |          |             |            |            |
| LXR β: -9.6    | MR: -9.2                                                                          | PPAR α: -8.1                                                                                                                                                                                                                                                                                                                                                                                                                                                                                        |          |              |            |                |            |                |          |              |             |             |          |              |              |              |          |             |            |            |
| PPAR β: -8.6   | PPAR γ: -8.2                                                                      | PR: -2.4                                                                                                                                                                                                                                                                                                                                                                                                                                                                                            |          |              |            |                |            |                |          |              |             |             |          |              |              |              |          |             |            |            |
| RXR α: -8.9    | TR α: -9.6                                                                        | TR β: -9.6                                                                                                                                                                                                                                                                                                                                                                                                                                                                                          |          |              |            |                |            |                |          |              |             |             |          |              |              |              |          |             |            |            |

Table S2. Acute toxicity, developmental toxicity, and mutagenicity of E2, luteolin, apigenin, quercetin, and genistein simulated by Toxicity Estimation Software Tool (T.E.S.T.). Photographs are from T.E.S.T. software.

| Chemicals                          | E2                                                                                | Apigenin                                                                          | Luteolin                                                                           | Quercetin                                                                           | Genistein                                                                           |
|------------------------------------|-----------------------------------------------------------------------------------|-----------------------------------------------------------------------------------|------------------------------------------------------------------------------------|-------------------------------------------------------------------------------------|-------------------------------------------------------------------------------------|
| <b>Structure</b>                   | 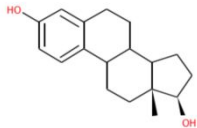 |  |  |  |  |
| <b>Fathead minnow LC50 (96 hr)</b> | Fathead minnow LC50 (96 hr) - Log10(mol/L)<br>5.62                                | 5.49                                                                              | 5.55                                                                               | 5.49                                                                                | 5.61                                                                                |
|                                    | Fathead minnow LC50 (96 hr) mg/L<br>0.65                                          | 0.88                                                                              | 0.81                                                                               | 0.97                                                                                | 0.66                                                                                |
| <b>Daphnia magna LC50 (48 hr)</b>  | Daphnia magna LC50 (48 hr) - Log10(mol/L)<br>4.91                                 | 5.06                                                                              | 4.8                                                                                | 4.54                                                                                | 4.62                                                                                |
|                                    | Daphnia magna LC <sub>50</sub> (48 hr) mg/L<br>3.39                               | 2.37                                                                              | 4.51                                                                               | 8.76                                                                                | 6.43                                                                                |
| <b>T. pyriformis IGC50 (48 hr)</b> | T. pyriformis IGC50 (48 hr) - Log10(mol/L)<br>4.99                                | 4.6                                                                               | 4.28                                                                               | 3.84                                                                                | 4.08                                                                                |
|                                    | T. pyriformis IGC50 (48 hr) mg/L<br>2.79                                          | 6.72                                                                              | 14.95                                                                              | 43.55                                                                               | 22.71                                                                               |
| <b>Oral rat LD50</b>               | Oral rat LD50 - Log10 (mol/kg)<br>2.36                                            | 2.2                                                                               | 2.12                                                                               | 2.04                                                                                | 2.36                                                                                |
|                                    | Oral rat LD50 mg/kg<br>1186.18                                                    | 1707.99                                                                           | 2175.63                                                                            | 2782.81                                                                             | 1172.86                                                                             |

|                                               |                               |                        |                        |                        |                        |                        |
|-----------------------------------------------|-------------------------------|------------------------|------------------------|------------------------|------------------------|------------------------|
| <b>Bioaccumulation factor</b>                 | Bioaccumulation factor Log10  | 2.19                   | 1.31                   | 1.19                   | 0.58                   | 1.21                   |
|                                               | Bioaccumulation factor        | 153.42                 | 20.62                  | 15.46                  | 3.84                   | 16.21                  |
| <b>Developmental Toxicity</b>                 | Developmental Toxicity value  | 0.95                   | 0.65                   | 0.88                   | 0.77                   | 0.76                   |
|                                               | Developmental Toxicity result | Developmental toxicant |
| <b>Mutagenicity</b>                           | Mutagenicity value            | 0.23                   | 0.29                   | 0.53                   | 0.55                   | 0.23                   |
|                                               | Mutagenicity result           | Mutagenicity Negative  | Mutagenicity Negative  | Mutagenicity Positive  | Mutagenicity Positive  | Mutagenicity Negative  |
| <b>Acute toxicity chemical classification</b> |                               | Class 4                | Class 4                | Class 5                | Class 5                | Class 4                |

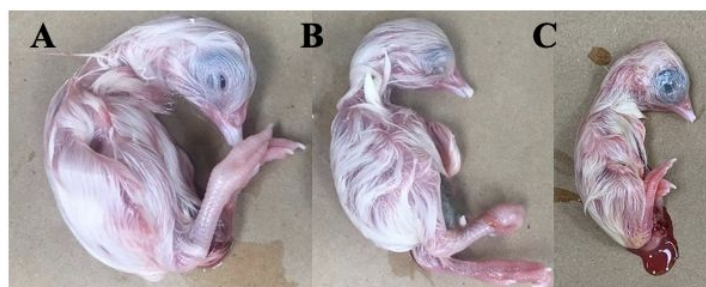

Figure S1. Different types of malformation found in chicken embryo (A: normal; B: deformed claw observed in quercetin 500  $\mu\text{g}/\text{kg}$ ; C: stunting observed in luteolin 47.7  $\mu\text{g}/\text{kg}$  treatment group).
